# Supplementary material
Source: publisher figshare collection journal article supplement (https://karger.figshare.com/articles/dataset/_/6391226)
Supplement: Supplementary file 1 [file 2]

## Sheet: Input
Input patient characteristics
Baseline depression severity (HAMD24 score): min:15 max:40	15
Baseline anxiety severity (IDS anxiety/arousal factor score): min:5 max:25	17
Age in years: min:25 max:65	25
Prior Medication	Yes
History of emotional or physical neglect	Yes
Marital status	single
Primary diagnosis depression type	Chronic major depression
Note: Our model may not provide valid predictions for high values for HAMD24 combined with low IDS and vice versa
Propability of dropping out within 12 weeks
CBASP:	0.585046
combination:	0.324228
medication	0.469636

## Sheet: data
Yes	single				Chronic major depression
No	married/defacto/in relationship				Dysthymia
	widowed/divorced/separated				Recurrent major depression with incomplete interepisode recovery
continous outcome
a0	-0.226	D11	0.358	sev0	-0.625	8		T1	T2	T3
b1	0.042	D12	0.298	IDS	1	9	time	CBASP	combination	medication
b2	0.389	D13	0.256	emotion	1	10	0	15	15	15
b3	0.0675	D14	0.257	prior	1	11	2	17.8817	16.033	15.1935
b4	-0.0256	D15	0.287	age	-1.66372	12	4	15.5937	14.225	13.2159
b5	0.049	D16	0.422	diagnos1	1	13	6	13.4497	12.417	11.9911
b6	0.101	D21	-0.0335	diagnos2	0	14	8	11.6497	10.609	11.0215
b7	0.0625	D22	-0.0547	married2	1	15	10	10.0817	8.801	10.7815
		D23	0.0182	married1	0	16	12	9.35369	6.993	9.4535
g1	-0.0561	D24	0.123
g2	0.168	D25	0.319
g3	0.0288	D26	0.379
g4	0.0855
Mu	-0.095
dropout
db1	0.11		dg1	-0.39
db2	-0.16		dg2	-0.87
db3	-0.07		dg3	-0.13		dr1	dr2	dr3
db4	-0.09		dg4	0.09		0.343523	-0.734408	-0.121606
db5	0.2		dMu	-1.75		0.585046	0.324228	0.469636		-1.36662
db6	0.42		dd1	0.71
db7	0.43		dd3	0.57
db8	-0.16
db9	-0.22
db10	-0.38
